# Supplementary material for: Rpd3 regulates single-copy origins independently of the rDNA array by opposing Fkh1-mediated origin stimulation
Source: PubMed Central journal article supplement — Proc Natl Acad Sci U S A. 2022 Sep 26;119(40):e2212134119. doi: 10.1073/pnas.2212134119 (PMC9546531; doi:10.1073/pnas.2212134119), 2022-09-26
Supplement: pnas.2212134119.sapp.pdf [file pnas.2212134119.sapp.pdf]

## Supporting Information for

Rpd3 regulates single-copy origins independently of the rDNA array by opposing origin stimulation by Fkh1.

Yiwei He, Meghan V. Petrie, Haiyang Zhang, Jared M. Peace, and Oscar M. Aparicio\*  
Molecular and Computational Biology Section, Department of Biological Sciences, University of Southern California, 1050 Childs Way, Los Angeles, CA 90089-2910

Oscar M. Aparicio\*  
Email: oaparici@usc.edu

### This PDF file includes:

Figures S1 to S5  
Legends for Figures S1 to S5

Tables S1 to S3  
Legends for Tables S1 to S3

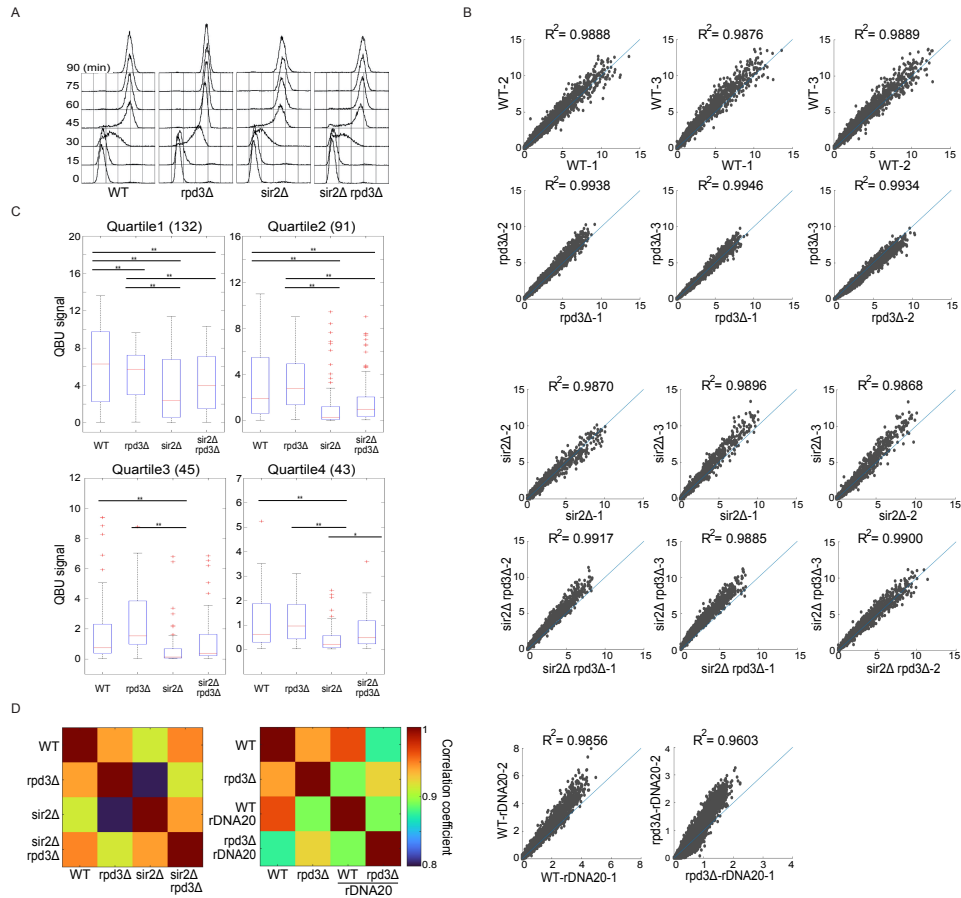

**Figure S1. DNA replication analysis of *WT*, *rpd3Δ*, *sir2Δ*, and *rpd3Δ sir2Δ* strains.** (A) Strains CVy43 (*WT*), CVy44 (*rpd3Δ*), YHy3 (*sir2Δ*), and YHy6 (*sir2Δ rpd3Δ*) were synchronized in G1 phase and released into S phase without HU for DNA content analysis. (B) QBU values (1kbp bins) for individual experimental replicates described in Figure 1 legend are plotted against each other. (C) Boxplot distributions of QBU counts across for 500bp regions aligned on origins of the indicated  $T_{Rep}$  quartiles; the number of origins in each group is indicated within parentheses; two-sided t-tests were performed on all pairs of strains and results are indicated as: \*= $p < 0.05$ , \*\*= $p < 0.01$ . (D) Heatmaps of correlation coefficients based on QBU signals for 5kbp regions centered on 625 potential origins.

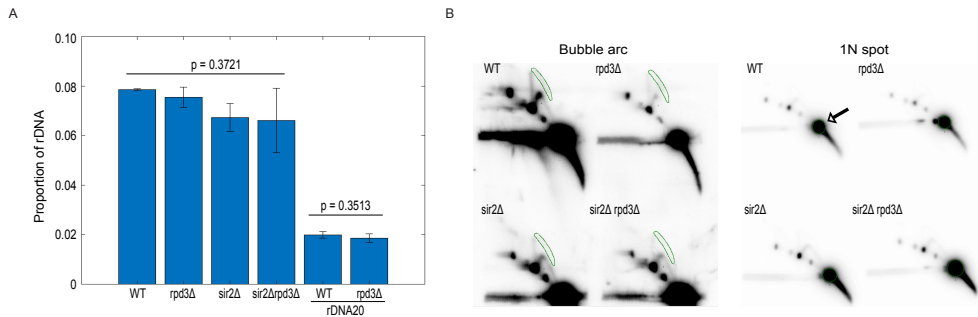

**Figure S2. Analysis of rDNA copy numbers and quantification of 2D gels. (A)** Total genomic DNA isolated from G1-arrested cells of strains described in Figure 1 were subjected to high-throughput sequencing, and read counts for the rDNA region were divided by the total read counts mapping to the nuclear genome; results of ANOVA test comparing the first four strains is given, and result of two-sided t-test for the rDNA20 strains are given. **(B)** Images of 2D gels (one set of two replicates) showing the actual areas analyzed for quantification shown in Figure 2.

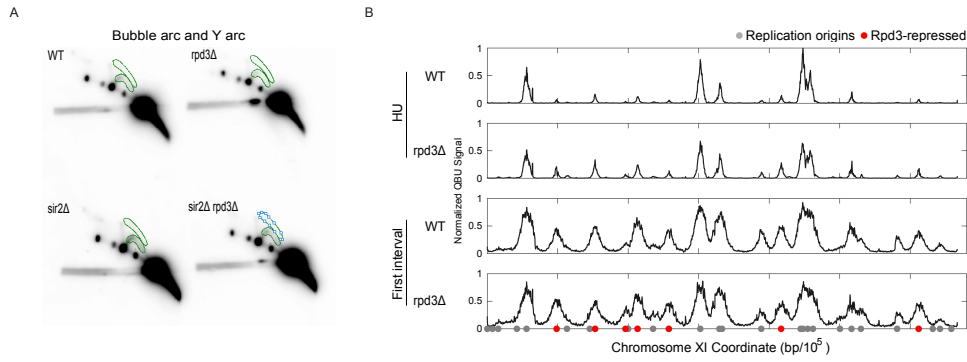

**Figure S3. *RPD3* deletion de-represses similar origins with or without HU. (A)** Images of 2D gels (one set of three replicates) showing the actual areas analyzed for quantification shown in Figure 3. **(B)** Chromosome plots comparing QBU origin-firing profiles in HU versus the first interval of the time-course.

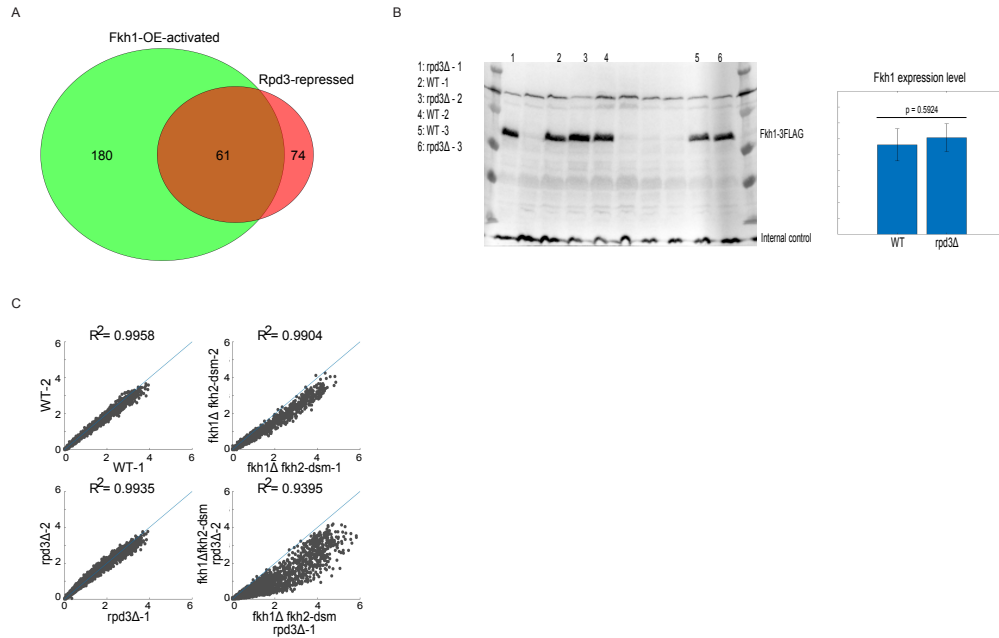

**Figure S4. Fkh1 overexpression stimulates firing of Rpd3-repressed origins. (A)** Venn diagram shows intersection of Fkh1-overexpression-activated origins (Table S3) with Rpd3-repressed origins called in this study (Table S1). **(B)** Immunoblot analysis of Fkh1-3xFLAG levels in independent transformants of *WT* and *rpd3Δ* strains (see key); blank lanes are transformants lacking Fkh1-3xFLAG, and outside lanes contain molecular weight markers. Quantification of the Fkh1-3xFLAG band was determined against the band labeled Internal control; result of t-test comparing protein levels in *WT* versus *rpd3Δ* is shown. **(C)** QBU values (1kbp bins) for individual experimental replicates described in Figure 4 legend are plotted against each other.

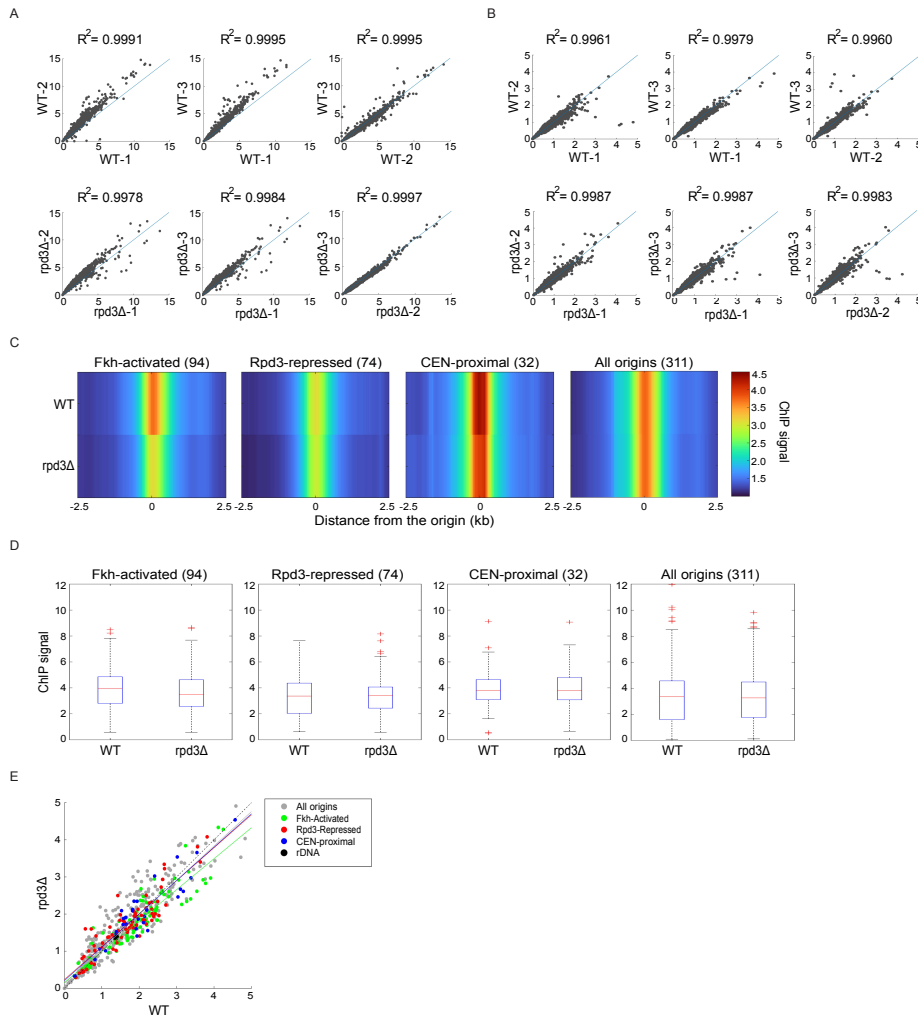

**Figure S5. Mcm4 origin association unaffected by *RPD3* deletion.** (A, B) ChIP enrichment values (1kbp bins) for individual experimental replicates described in Figure 5 legend and below are plotted against each other. (C-E) Strains MPy102 (*MCM4-3xHA*) and YHy37 (*rpd3Δ*, *MCM4-3xHA*) were synchronized in G1 phase and subjected to ChIP-seq. (C) Heatmaps of ChIP-seq enrichment at selected origin loci; the number in each group is indicated within parentheses. (D) Boxplots distributions of ChIP-seq enrichments for 500bp regions aligned on origins of the indicated sub-groups; the number of origins in each group is indicated within parentheses. Two-sided t-tests were performed on all pairs of strains and results are indicated as: \*= $p < 0.05$ , \*\*= $p < 0.01$ . (E) Two-dimensional scatter plots of ChIP-seq signals for 500bp regions centered on

626 origins plus the indicated origin groups; origins and sub-groups are color-coded as indicated.

A linear regression deriving the best-fit line is shown for each origin group.

**Table S1. List of RPD3-repressed origins.**

| Chr | Start   | End     |
|-----|---------|---------|
| 1   | 124350  | 124599  |
| 2   | 773918  | 774348  |
| 2   | 389245  | 390368  |
| 2   | 801930  | 802617  |
| 2   | 378434  | 379194  |
| 4   | 46181   | 46237   |
| 4   | 316719  | 317111  |
| 4   | 1353494 | 1353667 |
| 4   | 232140  | 232618  |
| 4   | 1057828 | 1058076 |
| 4   | 1302579 | 1302819 |
| 4   | 123617  | 123902  |
| 5   | 212381  | 212630  |
| 5   | 301565  | 302061  |
| 5   | 429861  | 431061  |
| 6   | 68690   | 68869   |
| 6   | 216344  | 216692  |
| 7   | 352695  | 352917  |
| 7   | 653611  | 654091  |
| 7   | 607176  | 607619  |
| 7   | 318745  | 319455  |
| 7   | 64279   | 64528   |
| 7   | 659809  | 660054  |
| 7   | 163180  | 163447  |
| 8   | 392148  | 392391  |
| 8   | 245719  | 245968  |
| 8   | 168531  | 168773  |
| 8   | 380153  | 382157  |
| 8   | 45589   | 46076   |
| 8   | 501751  | 501992  |
| 8   | 56650   | 59172   |
| 9   | 136094  | 136335  |
| 9   | 310583  | 311070  |
| 9   | 80058   | 80557   |
| 10  | 654069  | 654309  |
| 10  | 161435  | 161860  |
| 10  | 353463  | 355722  |
| 10  | 67467   | 67949   |
| 11  | 152934  | 153173  |
| 11  | 416822  | 417055  |
| 11  | 213080  | 213385  |
| 11  | 98329   | 98568   |
| 11  | 611874  | 612107  |
| 11  | 257390  | 257839  |
| 11  | 196038  | 196284  |
| 12  | 622672  | 623123  |
| 12  | 1007180 | 1007470 |
| 12  | 76711   | 77163   |
| 12  | 947908  | 948358  |



|    |        |        |
|----|--------|--------|
| 12 | 794020 | 794269 |
| 13 | 554392 | 554750 |
| 13 | 836823 | 838167 |
| 13 | 94216  | 94463  |
| 13 | 420429 | 421629 |
| 14 | 279875 | 280108 |
| 14 | 449343 | 449588 |
| 14 | 61597  | 61894  |
| 14 | 498987 | 499232 |
| 14 | 89528  | 89802  |
| 15 | 514258 | 515458 |
| 15 | 766617 | 766862 |
| 15 | 759221 | 766221 |
| 15 | 72636  | 72872  |
| 15 | 85195  | 85444  |
| 15 | 489645 | 490129 |
| 15 | 854735 | 855228 |
| 15 | 154972 | 155462 |
| 16 | 584037 | 584486 |
| 16 | 427273 | 428757 |
| 16 | 456557 | 456805 |
| 16 | 89758  | 92975  |
| 16 | 384536 | 384784 |
| 16 | 687133 | 694133 |
| 16 | 684383 | 684632 |

**Table S2. List of CEN-proximal origins.**

| Chr | Start  | End    |
|-----|--------|--------|
| 1   | 146703 | 147690 |
| 1   | 159906 | 160127 |
| 2   | 237644 | 237879 |
| 2   | 254890 | 255136 |
| 3   | 114314 | 114933 |
| 3   | 108775 | 109291 |
| 4   | 462430 | 462700 |
| 4   | 435056 | 435388 |
| 5   | 145539 | 145782 |
| 5   | 173636 | 173874 |
| 6   | 135979 | 136080 |
| 6   | 167606 | 168041 |
| 7   | 484932 | 485160 |
| 7   | 508729 | 508978 |
| 8   | 115683 | 117257 |
| 8   | 111293 | 111766 |
| 9   | 357156 | 357393 |
| 9   | 341853 | 342096 |
| 10  | 442248 | 442658 |
| 10  | 416888 | 417134 |
| 11  | 447657 | 447892 |
| 11  | 454453 | 459197 |
| 12  | 150914 | 151421 |
| 12  | 139293 | 140447 |
| 13  | 263062 | 263296 |
| 13  | 286782 | 287067 |
| 14  | 635660 | 635901 |
| 14  | 609458 | 609706 |
| 15  | 337279 | 337528 |
| 15  | 308969 | 309462 |
| 16  | 563822 | 564061 |
| 16  | 552403 | 554287 |

**Table S3. List of FKH1-OE-activated origins.**

| Chr | Start   | End     |
|-----|---------|---------|
| 1   | 42208   | 42209   |
| 1   | 70349   | 70350   |
| 1   | 124576  | 124577  |
| 1   | 137379  | 137380  |
| 2   | 28963   | 28964   |
| 2   | 93681   | 93682   |
| 2   | 177531  | 177532  |
| 2   | 198366  | 198367  |
| 2   | 209246  | 209247  |
| 2   | 407858  | 407859  |
| 2   | 486848  | 486849  |
| 2   | 802115  | 802116  |
| 2   | 379233  | 379234  |
| 2   | 170386  | 170387  |
| 2   | 631830  | 631831  |
| 3   | 166850  | 166851  |
| 4   | 123689  | 123690  |
| 4   | 253815  | 253816  |
| 4   | 316820  | 316821  |
| 4   | 476950  | 476951  |
| 4   | 505554  | 505555  |
| 4   | 567568  | 567569  |
| 4   | 629330  | 629331  |
| 4   | 703096  | 703097  |
| 4   | 878261  | 878262  |
| 4   | 1302607 | 1302608 |
| 4   | 1486966 | 1486967 |
| 4   | 639849  | 639850  |
| 4   | 86193   | 86194   |
| 4   | 753440  | 753441  |
| 4   | 1057719 | 1057720 |
| 4   | 46066   | 46067   |
| 4   | 1462344 | 1462345 |
| 4   | 407794  | 407795  |
| 4   | 1353196 | 1353197 |
| 4   | 213203  | 213204  |
| 4   | 1017480 | 1017481 |
| 4   | 228790  | 228791  |
| 5   | 301986  | 301987  |
| 5   | 316847  | 316848  |
| 5   | 353874  | 353875  |
| 5   | 287925  | 287926  |
| 5   | 438519  | 438520  |
| 5   | 407472  | 407473  |
| 5   | 213535  | 213536  |

|    |        |        |
|----|--------|--------|
| 5  | 164297 | 164298 |
| 6  | 216425 | 216426 |
| 6  | 118532 | 118533 |
| 6  | 68203  | 68204  |
| 7  | 204083 | 204084 |
| 7  | 977842 | 977843 |
| 7  | 574963 | 574964 |
| 7  | 64219  | 64220  |
| 7  | 163609 | 163610 |
| 7  | 319635 | 319636 |
| 7  | 568305 | 568306 |
| 7  | 660411 | 660412 |
| 7  | 999032 | 999033 |
| 7  | 765799 | 765800 |
| 8  | 133557 | 133558 |
| 8  | 297363 | 297364 |
| 8  | 380923 | 380924 |
| 8  | 502050 | 502051 |
| 8  | 168397 | 168398 |
| 8  | 245566 | 245567 |
| 8  | 359199 | 359200 |
| 8  | 391532 | 391533 |
| 8  | 78716  | 78717  |
| 9  | 73807  | 73808  |
| 9  | 80481  | 80482  |
| 9  | 105993 | 105994 |
| 9  | 136324 | 136325 |
| 9  | 247698 | 247699 |
| 9  | 310658 | 310659 |
| 9  | 196640 | 196641 |
| 10 | 67886  | 67887  |
| 10 | 161644 | 161645 |
| 10 | 228315 | 228316 |
| 10 | 337217 | 337218 |
| 10 | 354353 | 354354 |
| 10 | 374791 | 374792 |
| 10 | 299049 | 299050 |
| 10 | 455549 | 455550 |
| 10 | 654623 | 654624 |
| 11 | 153151 | 153152 |
| 11 | 98573  | 98574  |
| 11 | 612115 | 612116 |
| 11 | 642646 | 642647 |
| 11 | 195981 | 195982 |
| 11 | 302607 | 302608 |
| 11 | 388987 | 388988 |
| 11 | 517034 | 517035 |
| 11 | 213518 | 213519 |

|    |         |         |
|----|---------|---------|
| 11 | 417191  | 417192  |
| 11 | 581850  | 581851  |
| 11 | 16317   | 16318   |
| 11 | 329776  | 329777  |
| 11 | 258184  | 258185  |
| 11 | 530926  | 530927  |
| 12 | 76746   | 76747   |
| 12 | 450643  | 450644  |
| 12 | 730434  | 730435  |
| 12 | 928208  | 928209  |
| 12 | 947991  | 947992  |
| 12 | 1007319 | 1007320 |
| 12 | 623203  | 623204  |
| 12 | 659711  | 659712  |
| 12 | 745314  | 745315  |
| 12 | 889006  | 889007  |
| 12 | 412469  | 412470  |
| 12 | 794525  | 794526  |
| 12 | 688195  | 688196  |
| 12 | 290047  | 290048  |
| 12 | 139853  | 139854  |
| 12 | 198446  | 198447  |
| 13 | 40138   | 40139   |
| 13 | 94377   | 94378   |
| 13 | 158926  | 158927  |
| 13 | 421301  | 421302  |
| 13 | 433282  | 433283  |
| 13 | 554466  | 554467  |
| 13 | 689069  | 689070  |
| 13 | 837710  | 837711  |
| 13 | 878637  | 878638  |
| 13 | 865281  | 865282  |
| 13 | 898047  | 898048  |
| 13 | 31678   | 31679   |
| 13 | 611499  | 611500  |
| 13 | 535533  | 535534  |
| 13 | 370902  | 370903  |
| 13 | 804926  | 804927  |
| 13 | 226807  | 226808  |
| 13 | 504481  | 504482  |
| 14 | 126850  | 126851  |
| 14 | 169687  | 169688  |
| 14 | 343561  | 343562  |
| 14 | 412385  | 412386  |
| 14 | 449430  | 449431  |
| 14 | 546038  | 546039  |
| 14 | 691523  | 691524  |
| 14 | 322229  | 322230  |

|    |        |        |
|----|--------|--------|
| 14 | 61919  | 61920  |
| 14 | 89827  | 89828  |
| 14 | 498922 | 498923 |
| 14 | 279620 | 279621 |
| 15 | 72714  | 72715  |
| 15 | 85214  | 85215  |
| 15 | 155155 | 155156 |
| 15 | 227853 | 227854 |
| 15 | 348277 | 348278 |
| 15 | 354524 | 354525 |
| 15 | 371940 | 371941 |
| 15 | 436914 | 436915 |
| 15 | 464305 | 464306 |
| 15 | 490091 | 490092 |
| 15 | 854790 | 854791 |
| 15 | 908318 | 908319 |
| 15 | 874443 | 874444 |
| 15 | 308932 | 308933 |
| 15 | 766504 | 766505 |
| 15 | 981900 | 981901 |
| 15 | 566938 | 566939 |
| 15 | 783043 | 783044 |
| 16 | 90544  | 90545  |
| 16 | 179437 | 179438 |
| 16 | 210534 | 210535 |
| 16 | 241741 | 241742 |
| 16 | 261434 | 261435 |
| 16 | 684383 | 684384 |
| 16 | 881098 | 881099 |
| 16 | 289715 | 289716 |
| 16 | 842632 | 842633 |
| 16 | 819129 | 819130 |
| 16 | 116468 | 116469 |
| 16 | 418083 | 418084 |
| 16 | 584547 | 584548 |
| 16 | 456925 | 456926 |
| 16 | 42825  | 42826  |
| 16 | 384955 | 384956 |
| 16 | 72806  | 72807  |
